# Supplementary material
Source: HighWire-hosted journal article supplement (https://www.rcpjournals.org/highwire/filestream/10996/field_highwire_adjunct_files/1/Wingfield_Supplementary_S2.pdf)
Supplement: Wingfield_Supplementary_S2.pdf [file Wingfield_Supplementary_S2.pdf]

**Supplementary material S2: Calls received by referrer location, grade, and department over 14 months**

|                                                           | n (%)      |
|-----------------------------------------------------------|------------|
| <b>Total calls (n=590)</b>                                |            |
| <i>Average calls per month; median (IQR)*</i>             | 39 (19-56) |
| <b>Total patients discussed (n=362)</b>                   |            |
| <i>Patients discussed per month; median (IQR)</i>         | 24 (11-36) |
| <i>TIDU Specialist Trainees per patient; mean (range)</i> | 1.2 (1-5)  |
| <b>Caller Location** (n=362)</b>                          |            |
| <i>Hospital</i>                                           | 248 (68)   |
| <i>General Practitioner</i>                               | 105 (29)   |
| <i>Patient self-referral</i>                              | 3 (1)      |
| <i>Other</i>                                              | 3 (1)      |
| <i>Undocumented</i>                                       | 3 (1)      |
| <b>Grade of staff calling from hospitals (n=248)</b>      |            |
| <i>Core Medical or Surgical Trainee</i>                   | 87 (35)    |
| <i>Specialist Trainee</i>                                 | 62 (25)    |
| <i>Consultant Physician or Surgeon</i>                    | 54 (22)    |
| <i>Foundation Year 1 or 2 Doctor</i>                      | 21 (8)     |
| <i>Nurse Specialist / Advanced Nurse Practitioner</i>     | 15 (6)     |
| <i>Student</i>                                            | 2 (1)      |
| <i>Other</i>                                              | 5 (2)      |
| <i>Undocumented</i>                                       | 2 (1)      |
| <b>Department of staff calling from hospitals (n=248)</b> |            |
| <i>Medical Specialty</i>                                  | 78 (31)    |
| <i>Acute Medicine</i>                                     | 69 (28)    |
| <i>Accident and Emergency Department</i>                  | 53 (21)    |
| <i>Surgical Specialty</i>                                 | 22 (9)     |
| <i>Critical Care</i>                                      | 18 (7)     |
| <i>Psychiatry</i>                                         | 2 (1)      |
| <i>Other</i>                                              | 4 (2)      |
| <i>Undocumented</i>                                       | 2 (1)      |

Legend: Abbreviations: IQR = interquartile range. \*This does not include those calls received in June 2017 because the project was implemented mid-way through the month on June 19<sup>th</sup> 2017 \*\*Hospital includes any secondary care facility, GP includes walk-in primary care centres, "Other" constituted Liverpool Football Club (n=1), Community TB team (n=1), and Prison (n=1). "Other" Hospital Grade includes pharmacist (n=1), physiotherapist (n=1), and patient self-referrals (n=3). "Other" department

of staff calling from hospitals included the National Aspergillosis Centre (n=1), pharmacy (n=1), physiotherapy (n=1), and dentistry (n=1).
